# Supplementary material for: Decreased translation of Dio3 mRNA is associated with drug-induced hepatotoxicity
Source: Oxford University Press journal article supplement (doi:10.1042/bj20130049), 2013-04-17
Supplement: bj4530071add.pdf [file bj4530071add.pdf]

## SUPPLEMENTARY ONLINE DATA

# Decreased translation of *Dio3* mRNA is associated with drug-induced hepatotoxicity

Kate M. DUDEK<sup>\*1</sup>, Laura SUTER<sup>†</sup>, Veerle M. DARRAS<sup>‡</sup>, Emma L. MARCZYLO<sup>§</sup> and Timothy W. GANT<sup>§1</sup>

<sup>\*</sup>Systems Toxicology Group, Medical Research Council Toxicology Unit, University of Leicester, Lancaster Road, Leicester LE1 9HN, U.K., <sup>†</sup>Institut für Chemie und Bioanalytik, School of Life Sciences, University of Applied Sciences and Art Northwestern Switzerland (FHNW), Mattenstrasse 22, Basel 4132, Muttentz, Switzerland, <sup>‡</sup>Laboratory of Comparative Endocrinology, Department of Biology, Section Animal Physiology and Neurobiology, KU Leuven, Naamsestraat 61, PB 2464, Leuven, B-3000, Belgium, and <sup>§</sup>Centre for Radiation, Chemical and Environmental Hazards, Public Health England, Harwell Campus, Didcot, Oxfordshire OX11 0RQ, U.K.

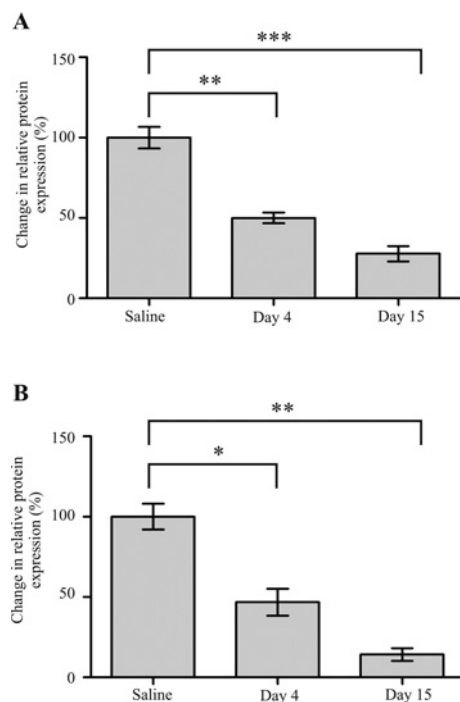

**Figure S1** D3 protein is down-regulated in both a time- and dose-dependent manner

Western blot analysis was performed on lysates from the livers of rats treated with various hepatotoxic agents. D3 protein levels were normalized to those of GAPDH. Representative gel images are shown for PredTox compounds FP004BA (**A**) and FP014SC (**B**). Mean relative levels of D3 are indicated beneath each gel image. Results are means  $\pm$  S.E.M. ( $n = 3$ ).  $^*P \leq 0.05$ ,  $^{**}P \leq 0.01$ ,  $^{***}P \leq 0.001$  (ANOVA with Tukey's/Dunnett's post-hoc test).

<sup>1</sup> Correspondence may be addressed to either of these authors (email kmp15@leicester.ac.uk or tim.gant@phe.gov.uk).

The full dataset for translational microarray analysis of liver samples treated with PredTox hepatotoxic compound FP014SC has been submitted to the Gene Expression Omnibus under accession number GSE38807.

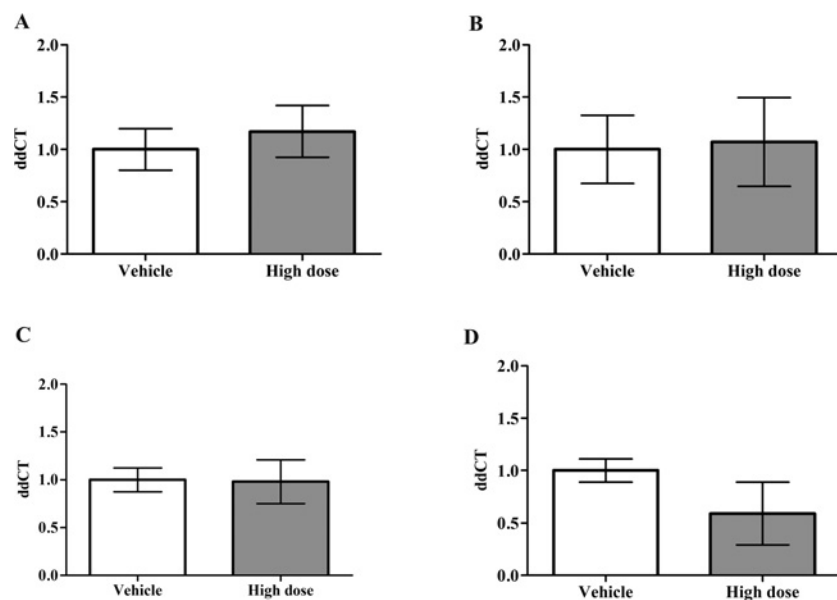

**Figure S2 The reduction in D3 protein is not due to changes in mRNA transcription**

qRT-PCR analysis was performed on RNA extracted from the livers of rats treated with high doses of PredTox compounds FP004BA (A), FP005ME (B), FP013NO (C) and FP014SC (D) for 15 days. Results are means  $\pm$  S.E.M. ( $n = 3$ ).

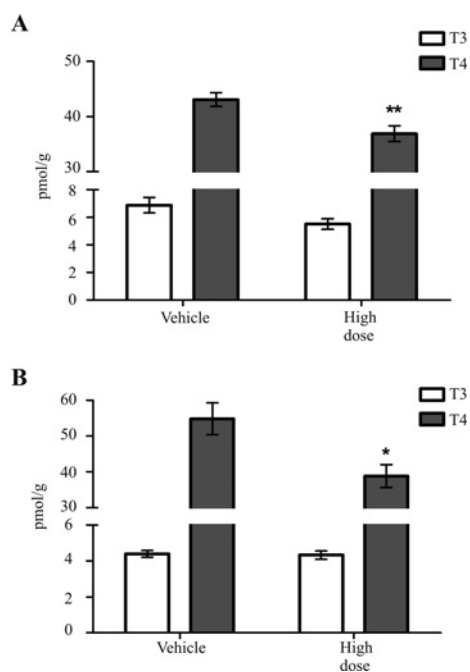

**Figure S3 T<sub>4</sub> levels within the liver are significantly reduced following drug-induced liver damage**

Liver samples were taken for measurement using highly sensitive and specific RIAs following high-dose treatment with PredTox compounds FP004BA (A) and FP014SC (B). Results represent means  $\pm$  S.E.M. ( $n \geq 3$ ). \* $P \leq 0.05$ , \*\* $P \leq 0.01$  (Student's  $t$  test).

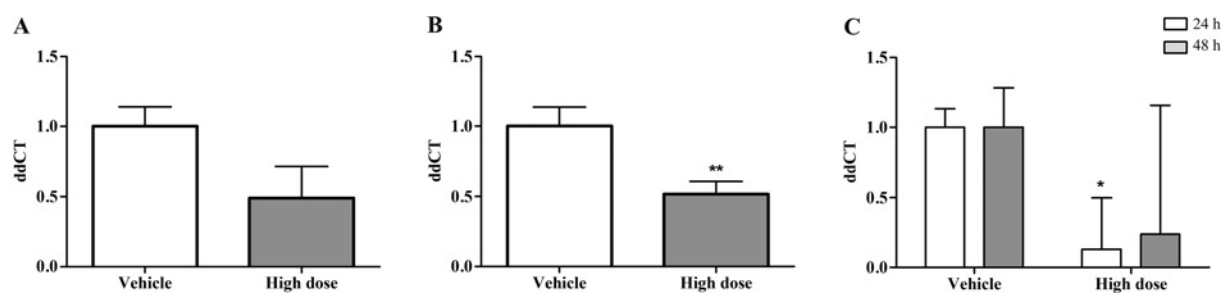

**Figure S4** *Dio1* mRNA is transcriptionally down-regulated

qRT-PCR analysis was performed on RNA extracted from the livers of rats treated with high doses of PredTox compounds FP004BA (**A**) and FP007SE (**B**) for 15 days and (**C**) 150 mg/kg thioacetamide. Results are means  $\pm$  S.E.M. ( $n = 3$ ). \* $P \leq 0.05$ , \*\* $P \leq 0.001$  (Student's  $t$  test).

**Table S1** PredTox compounds and their properties

All available data on the five PredTox compounds selected for further analysis in the present study are provided.

| Framework Programme 6 study name | Compound sponsor | Official name                                                                         | Structure                                                                            | Proposed high dose (mg/kg) | Proposed low dose (mg/kg) | Target organs | Chemical class         | Pharmacological class            |
|----------------------------------|------------------|---------------------------------------------------------------------------------------|--------------------------------------------------------------------------------------|----------------------------|---------------------------|---------------|------------------------|----------------------------------|
| FP004BA                          | Bayer            | (+)-(1 <i>R</i> )-1-[4-(4-fluorophenyl)-2,6-diisopropyl-5-propyl-pyridin-3-yl]ethanol | 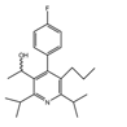   | 100                        | 20                        | Liver, kidney | 4-Phenylpyridine       | Glucagon receptor antagonist     |
| FP005ME                          | Merck            | 1-(2-Trifluoromethoxyphenyl)-2-nitroethanone                                          |    | 350                        | 15                        | Liver         | Carbonylnitromethane   | Carbonylnitromethanes            |
| FP007SE                          | Serono           | –                                                                                     | –                                                                                    | 1000                       | 100                       | Kidney, liver | –                      | –                                |
| FP013N0                          | Novartis         | –                                                                                     |   | –                          | –                         | –             | Cyclosporin derivative | –                                |
| FP014SC                          | Schering         | Tetraethyl[(3-hydroxy-2-pyridyl)-amino]-methanediphosphonate                          |  | 1120                       | 280                       | Liver         | Bisphosphonate         | Inhibitor of osteoclast activity |

**Table S2** Primer sequences

Sequences of primers used to generate *Dio3* and *Actb* probes used in qRT-PCR and PCR experiments.

| Gene        | Experiment         | Direction | Sequence (5'→3')       |
|-------------|--------------------|-----------|------------------------|
| <i>Dio3</i> | qRT-PCR            | Forward   | AGAGTGGCACCATCATGTACCA |
|             |                    | Reverse   | CCAAGTGCGCAACTCAGACA   |
| <i>Dio3</i> | PCR and sequencing | Forward   | GTGGTCGGAGAAGGTGAA     |
|             |                    | Reverse   | AGAGGCGCTCAAAATAGG     |
| <i>Actb</i> | qRT-PCR            | Forward   | CGTGAAAAGATGACCCAGATCA |
|             |                    | Reverse   | CACAGCCTGGATGGCTACGT   |
| <i>Actb</i> | PCR                | Forward   | ATGGTGGGTATGGGTCAGAA   |
|             |                    | Reverse   | ACATCTGCTGGAAGGTGGAC   |

**Table S3** mRNAs changed in translational activity following treatment with PredTox compound FP014SC

Differentially translated mRNAs were identified following sucrose density fractionation and polysome profiling of liver samples treated with FP014SC. Those mRNAs that showed a statistically significant ( $P \leq 0.05$ ) difference in ribosomal occupancy in at least one subpool of fractions when compared with vehicle-treated samples are listed. Significant values are denoted by bold type. *Dio3* is highlighted. Fold changes are colour-coded as indicated in the key.

|                |               | Fold change |           |        |                      |                                |
|----------------|---------------|-------------|-----------|--------|----------------------|--------------------------------|
|                |               | 3.4         | 1.0       | 0.2    |                      |                                |
| Name           | Accession     | Monosomes   | Polysomes |        | Translational change | Average mRNA transcript change |
|                |               |             | Light     | Medium | Heavy                |                                |
| Aldob          | NM_144903     | -1.379      | 0.023     | 0.284  | 1.759                | ↑ 0.17                         |
| Rbp4           | NM_112255     | -0.639      | -0.084    | 0.141  | 1.418                | ↑ 0.21                         |
| Cat            | NM_9804       | -0.952      | -0.572    | -0.091 | 0.918                | ↑ -0.17                        |
| Crp            | NM_7768       | -1.022      | 0.012     | 0.283  | 0.478                | ↑ -0.06                        |
| Nin            | NM_8697       | -0.842      | 0.070     | 0.033  | 0.697                | ↑ -0.01                        |
| 1700072122Rk   |               | -0.522      | 0.084     | 0.056  | 0.928                | ↑ 0.14                         |
| Fts            | BC008130_exon | -0.515      | 0.080     | 0.166  | 0.839                | ↑ 0.14                         |
| Spp2           | NM_29269      | -0.511      | -0.186    | 0.097  | 0.652                | ↑ 0.01                         |
| 5930437A14Rk   | NM_172542     | -0.791      | -0.099    | 0.032  | 0.395                | ↑ -0.12                        |
| Mug2           | NM_8646       | -1.032      | -0.410    | -0.204 | 0.049                | ↑ -0.40                        |
| Mug1           | NM_8645       | -0.914      | -0.424    | 0.063  | 0.057                | ↑ -0.30                        |
| C330046E03     |               | -0.577      | 0.101     | -0.014 | 0.594                | ↑ 0.03                         |
| Samhd1         | BC067198_exon | -0.017      | 0.252     | 0.342  | 1.085                | ↑ 0.42                         |
| Pgrmc1         | NM_16783      | -0.657      | 0.155     | -0.111 | 0.543                | ↑ -0.02                        |
| A23007216Rk    | NM_175004     | -0.584      | 0.275     | 0.046  | 0.591                | ↑ 0.08                         |
| Kif16a         |               | -0.179      | 0.138     | 0.258  | 0.847                | ↑ 0.27                         |
| Ubb            | NM_11664      | 0.514       | 0.558     | 0.812  | 1.473                | ↑ 0.84                         |
| Pecr           | NM_23523      | -0.596      | -0.510    | -0.001 | 0.265                | ↑ -0.21                        |
| Maria1         | NM_133653     | -0.421      | -0.449    | -0.029 | 0.456                | ↑ -0.11                        |
| C530001K22Rk   |               | -0.671      | -0.266    | -0.153 | 0.306                | ↑ -0.20                        |
| Syts           | NM_16908      | -0.081      | 0.134     | 0.397  | 0.842                | ↑ 0.32                         |
| Pouf1f         | NM_11143      | 0.254       | 0.084     | 0.396  | 1.147                | ↑ 0.47                         |
| Propl          | NM_8936       | -0.356      | 0.072     | 0.174  | 0.581                | ↑ 0.12                         |
| Prsmel4        | NM_178248     | 0.208       | 0.115     | 0.378  | 1.089                | ↑ 0.45                         |
| Hspa8          | NM_31165      | 0.585       | 1.031     | 1.437  | 1.391                | ↑ 1.11                         |
| Ass1           | NM_7494       | -0.301      | -0.273    | 0.230  | 0.453                | ↑ 0.03                         |
| Rad9           | NM_11237      | -0.296      | 0.119     | 0.213  | 0.593                | ↑ 0.16                         |
| 3110004H13Rk   | NM_26068      | -0.117      | 0.018     | 0.263  | 0.718                | ↑ 0.22                         |
| 4933433G15Rk   |               | -0.195      | 0.048     | 0.268  | 0.444                | ↑ 0.19                         |
| 2210404O07Rk   | NM_125703     | 0.000       | 0.306     | 0.431  | 0.864                | ↑ 0.40                         |
| Ka2f1b         | NM_19962      | -0.471      | 0.107     | -0.016 | 0.461                | ↑ 0.02                         |
| 4933047H18Rk   | NM_132005     | -0.211      | -0.023    | 0.092  | 0.635                | ↑ 0.12                         |
| Lu             | NM_20486      | -0.556      | -0.231    | -0.106 | 0.278                | ↑ -0.15                        |
| Bat1a          | NM_19693      | -0.337      | 0.105     | 0.026  | 0.553                | ↑ 0.09                         |
| Imap38         | NM_8376       | -0.271      | 0.055     | 0.201  | 0.537                | ↑ 0.13                         |
| 9130221F21     | NM_485788     | 0.817       | 0.960     | 0.625  | 1.778                | ↑ 1.05                         |
| BC052055       | NM_182636     | -0.375      | -0.040    | -0.082 | 0.480                | ↑ 0.00                         |
| Foxb1          | NM_22378      | -0.022      | 0.075     | 0.203  | 0.773                | ↑ 0.26                         |
| AL016693       | NM_178686     | -0.299      | 0.023     | 0.228  | 0.461                | ↑ 0.10                         |
| Tpcn1          | NM_145853     | -0.190      | -0.021    | 0.125  | 0.587                | ↑ 0.13                         |
| Suht1a         | NM_133670     | -0.644      | -0.700    | -0.502 | 0.114                | ↑ -0.43                        |
| Rgs16          | NM_11267      | -0.350      | -0.257    | -0.025 | 0.379                | ↑ -0.06                        |
| Tenc1          | BC042190_exon | -0.410      | 0.162     | 0.125  | 0.405                | ↑ 0.07                         |
| unknown        | AK039504_exon | -0.144      | 0.364     | 0.131  | 0.732                | ↑ 0.27                         |
| Clec3f3        | NM_16751      | -0.275      | -0.038    | 0.118  | 0.470                | ↑ 0.07                         |
| Dhrs4          | NM_30686      | 0.154       | 0.248     | 0.520  | 0.818                | ↑ 0.44                         |
| Rac1           | NM_9007       | -0.356      | 0.092     | 0.022  | 0.412                | ↑ 0.04                         |
| 4932408F19Rk   | NM_207225     | -0.419      | -0.111    | 0.004  | 0.287                | ↑ -0.06                        |
| Map4k6-pending | BC011346_exon | -0.182      | 0.248     | 0.161  | 0.582                | ↑ 0.20                         |
| unknown        | AF108718_exon | -0.300      | -0.019    | 0.148  | 0.371                | ↑ 0.05                         |
| D3Erd300e      | NM_19995      | -0.086      | 0.091     | 0.195  | 0.608                | ↑ 0.20                         |
| Camk2b         | NM_7595       | -0.294      | 0.119     | 0.214  | 0.401                | ↑ 0.11                         |
| AI050334       | NM_207206     | -0.189      | 0.199     | 0.122  | 0.559                | ↑ 0.17                         |
| Card10         | NM_130859     | -0.053      | 0.083     | 0.254  | 0.611                | ↑ 0.22                         |
| Pe2            | NM_33602      | -0.211      | 0.090     | -0.024 | 0.539                | ↑ 0.10                         |
| Atp5g3         | NM_175015     | 0.618       | 0.859     | 0.957  | 1.292                | ↑ 0.93                         |
| Centg3         | NM_139153     | -0.105      | 0.039     | 0.221  | 0.539                | ↑ 0.17                         |
| Cd37           | NM_7645       | -0.290      | -0.029    | -0.018 | 0.411                | ↑ 0.02                         |
| Kcnc3          | NM_8422       | -0.157      | 0.128     | 0.181  | 0.526                | ↑ 0.17                         |
| Slc29a4        | NM_146257     | -0.169      | 0.038     | 0.180  | 0.468                | ↑ 0.13                         |
| Flih           | NM_22009      | -0.338      | -0.037    | 0.032  | 0.313                | ↑ -0.01                        |
| Pal4           | NM_27470      | -0.255      | 0.066     | 0.262  | 0.347                | ↑ 0.11                         |
| unknown        | AK085517_exon | -0.419      | -0.159    | -0.200 | 0.278                | ↑ -0.12                        |
| 170003910Rk    |               | -0.354      | -0.131    | -0.211 | 0.333                | ↑ -0.09                        |
| Pip3k1c        | NM_8844       | -0.123      | -0.011    | 0.162  | 0.463                | ↑ 0.12                         |
| 0910001L09Rk   | NM_132434     | -0.236      | 0.035     | 0.030  | 0.407                | ↑ 0.06                         |
| C330006A16Rk   |               | -0.177      | 0.179     | 0.200  | 0.457                | ↑ 0.16                         |
| D11Erd18e      | NM_26740      | -0.035      | 0.201     | 0.409  | 0.534                | ↑ 0.28                         |
| A930003A15Rk   |               | -0.223      | 0.054     | 0.113  | 0.393                | ↑ 0.08                         |
| Chra2          | NM_144803     | -0.447      | -0.095    | -0.071 | 0.178                | ↑ -0.11                        |
| Zfp162         | NM_11750      | 0.338       | 0.354     | 0.887  | 0.790                | ↑ 0.59                         |
| Ppnm           | NM_8985       | -0.287      | -0.037    | -0.056 | 0.337                | ↑ -0.01                        |
| Dykt1b         | NM_10092      | -0.181      | 0.081     | 0.097  | 0.422                | ↑ 0.10                         |
| 1110059M19Rk   | NM_135842     | 0.381       | 0.517     | 0.477  | 0.996                | ↑ 0.59                         |
| Sufi           |               | 0.217       | 0.010     | 0.188  | 0.757                | ↑ 0.29                         |
| Lg4            | NM_144556     | -0.060      | 0.085     | 0.203  | 0.497                | ↑ 0.18                         |
| Gm111          | NM_207234     | -0.148      | 0.105     | 0.076  | 0.455                | ↑ 0.12                         |
| Rbb4b6         | NM_172572     | -0.108      | 0.120     | 0.113  | 0.484                | ↑ 0.15                         |
| Apoc1          | NM_7469       | -0.685      | -0.794    | -0.718 | -0.127               | ↑ -0.58                        |
| Aire           | NM_9646       | -0.154      | 0.213     | 0.161  | 0.445                | ↑ 0.17                         |
| Enah           | NM_10135      | 0.031       | 0.238     | 0.204  | 0.623                | ↑ 0.27                         |
| unknown        | AK088050_exon | -0.214      | 0.050     | 0.131  | 0.340                | ↑ 0.08                         |
| 3110007P09Rk   | NM_144906     | -0.326      | -0.018    | 0.107  | 0.198                | ↑ -0.01                        |
| Nucl10         |               | 0.208       | 0.326     | 0.688  | 0.645                | ↑ 0.47                         |
| Srs            | NM_9293       | -0.175      | 0.108     | 0.134  | 0.374                | ↑ 0.11                         |
| Slc2a8         | NM_19488      | -0.069      | 0.054     | 0.112  | 0.469                | ↑ 0.14                         |
| Foxd1          | NM_199068     | -0.184      | 0.090     | 0.078  | 0.375                | ↑ 0.09                         |
| Pcsk2          | NM_8792       | -0.028      | 0.092     | 0.257  | 0.472                | ↑ 0.20                         |
| Klf1c          | NM_153103     | -0.198      | 0.017     | 0.040  | 0.346                | ↑ 0.05                         |
| Nxsf-2         | NM_183248     | -0.067      | 0.088     | 0.173  | 0.456                | ↑ 0.16                         |
| 4930471G24Rk   |               | -0.027      | 0.145     | 0.233  | 0.493                | ↑ 0.21                         |
| Vdp            | NM_19490      | -0.304      | -0.070    | 0.009  | 0.217                | ↑ -0.04                        |
| Brd4           | NM_20508      | -0.110      | 0.185     | 0.083  | 0.467                | ↑ 0.16                         |
| Mrp24          | NM_26591      | 0.195       | 0.378     | 0.448  | 0.715                | ↑ 0.43                         |
| MGC68323       | NM_199472     | -0.008      | 0.224     | 0.736  | 0.358                | ↑ 0.33                         |
| C030046101Rk   | NM_177994     | -0.284      | -0.055    | -0.080 | 0.259                | ↑ -0.04                        |
| Pdx9l          | NM_11876      | -0.193      | 0.020     | 0.119  | 0.304                | ↑ 0.06                         |
| Ppp1r14a       | NM_26731      | -0.004      | 0.230     | 0.171  | 0.543                | ↑ 0.23                         |
| Pcx            | NM_8797       | -0.063      | 0.033     | 0.138  | 0.415                | ↑ 0.13                         |
| Mrp49          | NM_26246      | -0.079      | 0.198     | 0.189  | 0.434                | ↑ 0.19                         |
| BC036564       | NM_194421     | 0.127       | 0.088     | 0.229  | 0.588                | ↑ 0.26                         |
| Ameb           | NM_9666       | -0.080      | 0.170     | 0.092  | 0.453                | ↑ 0.16                         |
| Apoe           | NM_9696       | -0.053      | 0.456     | 0.390  | 0.475                | ↑ 0.32                         |
| Abcf1          | NM_13854      | -0.198      | 0.041     | 0.155  | 0.268                | ↑ 0.07                         |
| Vim            | NM_11707      | -0.736      | -0.023    | -0.305 | -0.141               | ↑ -0.30                        |
| Chdc1          | NM_484393     | -0.167      | 0.036     | 0.006  | 0.343                | ↑ 0.05                         |
| 2410022L05Rk   | NM_25556      | -0.162      | -0.059    | -0.041 | 0.329                | ↑ 0.02                         |
| Krt1-24        | NM_16880      | -0.283      | -0.158    | -0.156 | 0.212                | ↑ -0.10                        |
| Tub            | NM_21885      | 0.050       | 0.115     | 0.259  | 0.486                | ↑ 0.23                         |
| Myo1a          |               | 0.150       | -0.104    | -0.184 | -0.307               | ↑ -0.11                        |
| Dusp15         | NM_145744     | 0.830       | 0.371     | 0.617  | 0.262                | ↑ 0.52                         |
| Rps5           | NM_9095       | 1.148       | 0.805     | 0.637  | 0.718                | ↑ 0.83                         |
| 8030442B05Rk   |               | 0.020       | -0.069    | -0.180 | -0.435               | ↑ -0.17                        |
| Zan            | NM_11741      | 0.188       | -0.106    | -0.133 | -0.300               | ↑ -0.09                        |
| M6a5Vpp1       | NC_1502       | -0.305      | -0.078    | -0.444 | -0.749               | ↑ -0.44                        |
| Sax1           | NM_9233       | 0.132       | 0.098     | -0.051 | -0.320               | ↑ -0.04                        |
| 4930448L02Rk   |               | 0.021       | -0.106    | -0.189 | -0.457               | ↑ -0.18                        |
| 4930557B21Rk   |               | 0.027       | 0.014     | -0.140 | -0.428               | ↑ -0.13                        |
| 1200090106Rk   | NM_28807      | -0.061      | -0.406    | -0.571 | -0.514               | ↑ -0.39                        |
| Splk1          | NM_25367      | -0.034      | 0.256     | -0.194 | -0.392               | ↑ -0.09                        |
| H2-M10.1       | NM_13544      | 0.100       | -0.124    | -0.340 | -0.345               | ↑ -0.18                        |
| Cxds           | NM_11733      | 0.603       | 0.175     | 0.277  | 0.044                | ↑ 0.27                         |
| Cyp11b2        | NM_9991       | -0.166      | -0.411    | -0.390 | -0.702               | ↑ -0.42                        |
| Hrg            | NM_53176      | -0.465      | -0.343    | -0.679 | -0.887               | ↑ -0.59                        |
| Smpd2          | NM_9213       | 0.066       | -0.078    | -0.151 | -0.446               | ↑ -0.15                        |
| 2610034P21Rk   |               | -0.017      | -0.056    | -0.290 | -0.481               | ↑ -0.21                        |
| Gfi1           | NM_10278      | 0.191       | -0.143    | 0.018  | -0.409               | ↑ -0.09                        |
| Pgdr           | NM_8962       | 1.087       | 0.879     | 0.727  | 0.590                | ↑ 0.82                         |
| 4631403P03Rk   | NM_153793     | -0.071      | -0.219    | -0.484 | -0.531               | ↑ -0.33                        |
| Acan3          | NM_30721      | -0.049      | -0.057    | -0.188 | -0.555               | ↑ -0.21                        |
| Gnh2-rs1       | NM_8143       | 0.450       | 0.094     | 0.088  | -0.100               | ↑ 0.13                         |
| D15Wsu169e     | NM_198420     | 0.080       | -0.116    | -0.154 | -0.460               | ↑ -0.16                        |
| Mup1           | NM_31188      | -1.238      | -1.816    | -2.335 | -1.619               | ↑ -1.75                        |
| Hist3h2ba      | NM_30082      | 0.208       | -0.167    | 0.044  | -0.417               | ↑ -0.08                        |
| Bcl6b          | NM_7528       | 0.351       | 0.375     | -0.034 | -0.071               | ↑ -0.16                        |
| AW547186       | NM_177592     | -0.042      | -0.042    | -0.082 | -0.589               | ↑ -0.19                        |
| Tmt3           | NM_11620      | 0.049       | -0.117    | -0.339 | -0.439               | ↑ -0.21                        |
| Atf1           | NM_7497       | -0.139      | -0.201    | -0.333 | -0.660               | ↑ -0.33                        |
| unknown>       |               |             |           |        |                      |                                |

**Table S4 Canonical pathways that were significantly perturbed (two or more genes) following treatment with PredTox compound FP014SC**

All mRNAs that showed a change in ribosomal occupancy across the gradient following polysome profiling were uploaded for pathway analysis to Ingenuity® IPA software. Those pathways under the control of RXR are in bold (FXR, farnesoid X receptor; IL-1, interleukin 1; LPS, lipopolysaccharide; LXR, liver X receptor; PPAR $\alpha$ , peroxisome-proliferator-activated receptor  $\alpha$ ; PXR, pregnane X receptor).

| Ingenuity® canonical pathway                                                   | — log ( <i>P</i> value) | Number of altered genes |
|--------------------------------------------------------------------------------|-------------------------|-------------------------|
| Fatty acid metabolism                                                          | 8.71                    | 15                      |
| <b>LPS/IL-1 mediated inhibition of RXR function</b>                            | 2.67                    | 10                      |
| Production of nitric oxide and reactive oxygen species in macrophages          | 3.10                    | 10                      |
| Clathrin-mediated endocytosis signalling                                       | 2.99                    | 10                      |
| G-protein-coupled receptor signalling                                          | 0.319                   | 9                       |
| mTOR signalling                                                                | 2.47                    | 9                       |
| Axonal guidance signalling                                                     | 0.689                   | 9                       |
| Glucocorticoid receptor signalling                                             | 1.51                    | 9                       |
| Tryptophan metabolism                                                          | 2.81                    | 8                       |
| Protein kinase A signalling                                                    | 0.834                   | 8                       |
| <b>PPAR<math>\alpha</math>/RXR<math>\alpha</math> activation</b>               | 2.11                    | 8                       |
| Metabolism of xenobiotics by cytochrome P450                                   | 3.18                    | 8                       |
| <b>LXR/RXR activation</b>                                                      | 3.15                    | 8                       |
| RAR activation                                                                 | 2.11                    | 8                       |
| eIF2 signalling                                                                | 1.94                    | 8                       |
| Regulation of eIF4 and p70 <sup>S6K</sup> signalling                           | 2.57                    | 8                       |
| Protein ubiquitination pathway                                                 | 1.16                    | 8                       |
| PI3K signalling in B-lymphocytes                                               | 2.14                    | 7                       |
| Role of macrophages, fibroblasts and endothelial cells in rheumatoid arthritis | 0.613                   | 7                       |
| Molecular mechanisms of cancer                                                 | 0.475                   | 7                       |
| Calcium signalling                                                             | 1.58                    | 7                       |
| Xenobiotic metabolism signalling                                               | 0.718                   | 7                       |
| Dopamine–DARPP32 feedback in cAMP signalling                                   | 1.71                    | 7                       |
| ERK/MAPK signalling                                                            | 1.47                    | 7                       |
| Acute-phase response signalling                                                | 1.67                    | 7                       |
| Valine, leucine and isoleucine degradation                                     | 3.11                    | 6                       |
| CREB signalling in neurons                                                     | 1.17                    | 6                       |
| B-cell receptor signalling                                                     | 1.48                    | 6                       |
| Breast cancer regulation by Statmin1                                           | 0.981                   | 6                       |
| Wnt $\beta$ -catenin signalling                                                | 1.19                    | 6                       |
| Bile acid biosynthesis                                                         | 3.58                    | 6                       |
| Arachidonic acid metabolism                                                    | 1.75                    | 6                       |
| RhoGDI signalling                                                              | 0.773                   | 5                       |
| Ephrin receptor signalling                                                     | 0.794                   | 5                       |
| Huntington's disease signalling                                                | 0.530                   | 5                       |
| Purine metabolism                                                              | 0.330                   | 5                       |
| Linoleic acid metabolism                                                       | 2.07                    | 5                       |
| Glycolysis/gluconeogenesis                                                     | 1.81                    | 5                       |
| Fatty acid elongation in mitochondria                                          | 4.93                    | 5                       |
| Phospholipase C signalling                                                     | 0.468                   | 5                       |
| Atherosclerosis signalling                                                     | 1.33                    | 5                       |
| IL-12 signalling and production in macrophages                                 | 1.15                    | 5                       |
| Actin cytoskeleton signalling                                                  | 0.554                   | 5                       |
| Sertoli cell–Sertoli cell junction signalling                                  | 0.745                   | 5                       |
| Semaphorin signalling in neurons                                               | 1.97                    | 4                       |
| NRF2-mediated oxidative stress response                                        | 0.457                   | 4                       |
| P2Y purigenic receptor signalling pathway                                      | 0.848                   | 4                       |
| Tyrosine metabolism                                                            | 1.46                    | 4                       |
| Pyruvate metabolism                                                            | 1.62                    | 4                       |
| Human embryonic stem cell pluripotency                                         | 0.753                   | 4                       |
| GNRH signalling                                                                | 0.821                   | 4                       |
| Role of NFAT in cardiac hypertrophy                                            | 0.439                   | 4                       |
| Synaptic long-term potentiation                                                | 1.02                    | 4                       |
| Colorectal cancer metastasis signalling                                        | 0.250                   | 4                       |
| Glioblastoma multiforme signalling                                             | 0.623                   | 4                       |
| PI3K/Akt signalling                                                            | 0.867                   | 4                       |
| PTEN signalling                                                                | 0.979                   | 4                       |
| Hereditary breast cancer signalling                                            | 0.886                   | 4                       |
| Tight junction signalling                                                      | 0.585                   | 4                       |
| IL-8 signalling                                                                | 0.491                   | 4                       |
| Glycerolipid metabolism                                                        | 1.05                    | 4                       |
| <b>FXR/RXR activation</b>                                                      | 1.25                    | 4                       |
| Inositol phosphate metabolism                                                  | 0.616                   | 4                       |
| AMPK signalling                                                                | 0.737                   | 4                       |
| Mitochondrial dysfunction                                                      | 0.737                   | 4                       |
| Type 2 diabetes mellitus signalling                                            | 0.906                   | 4                       |

**Table S4 Continued**

| Ingenuity® canonical pathway                                | – log (P value) | Number of altered genes |
|-------------------------------------------------------------|-----------------|-------------------------|
| Ceramide signalling                                         | 1.39            | 4                       |
| Aldosterone signalling in epithelial cells                  | 0.579           | 4                       |
| Amyotrophic lateral sclerosis signalling                    | 1.08            | 4                       |
| Signalling by Rho family GTPases                            | 0.266           | 4                       |
| Sphingosine 1-phosphate signalling                          | 0.926           | 4                       |
| Germ cell–Sertoli cell junction signalling                  | 0.573           | 4                       |
| p38 MAPK signalling                                         | 0.590           | 3                       |
| Circadian rhythm signalling                                 | 1.84            | 3                       |
| FGF signalling                                              | 0.787           | 3                       |
| Pentose and glucuronate interconversions                    | 1.55            | 3                       |
| GM-CSF signalling                                           | 1.08            | 3                       |
| Neuropathic pain signalling in dorsal horn neurons          | 0.605           | 3                       |
| iCOS–iCOSL signalling in T-helper cells                     | 0.590           | 3                       |
| PKC $\theta$ signalling in T-lymphocytes                    | 0.526           | 3                       |
| Prostate cancer signalling                                  | 0.820           | 3                       |
| Cyclins and cell-cycle regulation                           | 0.843           | 3                       |
| Aryl hydrocarbon receptor signalling                        | 0.401           | 3                       |
| Small-cell lung cancer signalling                           | 0.944           | 3                       |
| Thyroid cancer signalling                                   | 1.44            | 3                       |
| Non-small-cell lung cancer signalling                       | 1.03            | 3                       |
| Retinol metabolism                                          | 1.44            | 3                       |
| <b>TR/RXR activation</b>                                    | 0.777           | 3                       |
| Galactose metabolism                                        | 1.47            | 3                       |
| Alanine and aspartate metabolism                            | 1.55            | 3                       |
| Dendritic cell maturation                                   | 0.304           | 3                       |
| OX40 signalling pathway                                     | 0.766           | 3                       |
| Cdc42 signalling                                            | 0.293           | 3                       |
| Type 1 diabetes mellitus signalling                         | 0.567           | 3                       |
| Insulin receptor signalling                                 | 0.437           | 3                       |
| Natural killer cell signalling                              | 0.605           | 3                       |
| Oxidative phosphorylation                                   | 0.368           | 3                       |
| Role of Oct4 in mammalian embryonic stem cell pluripotency  | 1.42            | 3                       |
| Cardiac $\beta$ -adrenergic signalling                      | 0.426           | 3                       |
| fMLP signalling in neutrophils                              | 0.575           | 3                       |
| CCR3 signalling in eosinophils                              | 0.533           | 3                       |
| CXCR4 signalling                                            | 0.330           | 3                       |
| Paxillin signalling                                         | 0.629           | 3                       |
| LPS-stimulated MAPK signalling                              | 0.917           | 3                       |
| Regulation of actin-based motility by Rho                   | 0.787           | 3                       |
| Rac signalling                                              | 0.605           | 3                       |
| p70 <sup>S6K</sup> signalling                               | 0.476           | 3                       |
| NGF signalling                                              | 0.605           | 3                       |
| Androgen and oestrogen metabolism                           | 0.832           | 3                       |
| Sulfur metabolism                                           | 2.38            | 3                       |
| Fructose and mannose metabolism                             | 1.30            | 3                       |
| Renal cell carcinoma signalling                             | 0.958           | 3                       |
| Hypoxia signalling in the cardiovascular system             | 1.00            | 3                       |
| RhoA signalling                                             | 0.258           | 2                       |
| Neurotrophin/Trk signalling                                 | 0.498           | 2                       |
| ATM signalling                                              | 0.671           | 2                       |
| Arginine and proline metabolism                             | 0.466           | 2                       |
| Ubiquinone biosynthesis                                     | 0.490           | 2                       |
| Basal cell carcinoma signalling                             | 0.490           | 2                       |
| Factors promoting cardiogenesis in vertebrates              | 0.372           | 2                       |
| Role of Nanog in mammalian embryonic stem cell pluripotency | 0.266           | 2                       |
| Glioma signalling                                           | 0.329           | 2                       |
| Melatonin signalling                                        | 0.474           | 2                       |
| Urea cycle and metabolism of amino groups                   | 1.01            | 2                       |
| Oestrogen-dependent breast cancer signalling                | 0.581           | 2                       |
| p53 signalling                                              | 0.339           | 2                       |
| Bladder cancer signalling                                   | 0.361           | 2                       |
| Androgen signalling                                         | 0.254           | 2                       |
| Cell cycle: G <sub>1</sub> /S checkpoint regulation         | 0.624           | 2                       |
| Chronic myeloid leukaemia signalling                        | 0.334           | 2                       |
| Cell cycle regulation by BTG family proteins                | 0.942           | 2                       |
| HGF signalling                                              | 0.309           | 2                       |
| Pancreatic adenocarcinoma signalling                        | 0.278           | 2                       |
| <b>PXR/RXR activation</b>                                   | 0.498           | 2                       |
| IL-1 signalling                                             | 0.344           | 2                       |
| Glutamate receptor signalling                               | 0.613           | 2                       |

**Table S4 Continued**

| Ingenuity® canonical pathway                                         | – log ( <i>P</i> value) | Number of altered genes |
|----------------------------------------------------------------------|-------------------------|-------------------------|
| Butanoate metabolism                                                 | 0.581                   | 2                       |
| Telomerase signalling                                                | 0.305                   | 2                       |
| Cross-talk between dendritic cells and natural killer cells          | 0.355                   | 2                       |
| Cytotoxic T-lymphocyte-mediated apoptosis of target cells            | 0.409                   | 2                       |
| Allograft rejection signalling                                       | 0.397                   | 2                       |
| Caveolae-mediated endocytosis signalling                             | 0.458                   | 2                       |
| Virus entry via endocytic pathways                                   | 0.355                   | 2                       |
| Neuroprotective role of THOP1 in Alzheimer's disease                 | 0.848                   | 2                       |
| FcεRI signalling                                                     | 0.291                   | 2                       |
| PDGF signalling                                                      | 0.482                   | 2                       |
| CD40 signalling                                                      | 0.552                   | 2                       |
| TNFR1 signalling                                                     | 0.724                   | 2                       |
| Angiopoietin signalling                                              | 0.533                   | 2                       |
| Parkinson's disease signalling                                       | 1.45                    | 2                       |
| Apoptosis signalling                                                 | 0.361                   | 2                       |
| Retinoic acid-mediated apoptosis signalling                          | 0.552                   | 2                       |
| Citrate cycle                                                        | 1.08                    | 2                       |
| Activation of IRF by cytosolic pattern recognition receptors         | 0.552                   | 2                       |
| Dopamine receptor signalling                                         | 0.444                   | 2                       |
| CDK5 signalling                                                      | 0.372                   | 2                       |
| Regulation of IL-2 expression in activated and anergic T-lymphocytes | 0.423                   | 2                       |
| CD28 signalling in T-helper cells                                    | 0.240                   | 2                       |
| Agrin interactions at neuromuscular junctions                        | 0.507                   | 2                       |
| FAK signalling                                                       | 0.372                   | 2                       |
| PAK signalling                                                       | 0.361                   | 2                       |
| Renin-angiotensin signalling                                         | 0.266                   | 2                       |
| Role of BRCA1 in DNA damage response                                 | 0.624                   | 2                       |
| Sphingolipid metabolism                                              | 0.397                   | 2                       |
| Keratan sulfate biosynthesis                                         | 0.635                   | 2                       |
| Inositol metabolism                                                  | 2.41                    | 2                       |
| G-protein signalling mediated by Tubby                               | 0.963                   | 2                       |
| 14-3-3-mediated signalling                                           | 0.226                   | 2                       |
| Starch and sucrose metabolism                                        | 0.507                   | 2                       |

Received 9 January 2013/12 April 2013; accepted 16 April 2013

Published as BJ Immediate Publication 16 April 2013, doi:10.1042/BJ20130049
